# Supplementary material for: Integrative genomic expression analysis reveals stable differences between lung cancer and systemic sclerosis
Source: Springer Nature journal article supplement (doi:10.1186/s12885-021-07959-6), 2021-03-10
Supplement: MOESM1 [file 18951444]

**Integrative genomic expression analysis reveals stable differences between lung cancer and systemic sclerosis**

Heng Li<sup>1,2</sup>, Liping Ding<sup>1</sup>, Xiaoping Hong<sup>1</sup>, Yulan Chen<sup>1</sup>, Rui Liao<sup>1</sup>, Tingting Wang<sup>1,2</sup>, Shuhui Meng<sup>1</sup>, Zhenyou Jiang<sup>3,\*</sup>, Dongzhou Liu<sup>1,\*</sup>

<sup>1</sup>Department of Rheumatology and Immunology, Shenzhen People's Hospital, The Second Clinical Medical College of Jinan University, Shenzhen 518020, China

<sup>2</sup>Integrated Chinese and Western Medicine Postdoctoral research station, Jinan University, Guangzhou 510632, China

<sup>3</sup>Department of Microbiology and Immunology, School of Medicine, Jinan University, Guangzhou, China

\*Correspondence: [liu\\_dz2001@sina.com](mailto:liu_dz2001@sina.com) (Dongzhou Liu) and [tjzhy@jnu.edu.cn](mailto:tjzhy@jnu.edu.cn) (Zhenyou Jiang)

**Table S1** Data of 61 patients with systemic sclerosis, 70 patients with lung cancer and 224 normal healthy individuals. Underlined accessions are removed by principal component analysis.

| Group | Accession                                                                                                                                                                                                                                                                                                                                                                                                                                                                                                                                                                                                                                                                                                                                                                                                                                                                                                          | Platform |
|-------|--------------------------------------------------------------------------------------------------------------------------------------------------------------------------------------------------------------------------------------------------------------------------------------------------------------------------------------------------------------------------------------------------------------------------------------------------------------------------------------------------------------------------------------------------------------------------------------------------------------------------------------------------------------------------------------------------------------------------------------------------------------------------------------------------------------------------------------------------------------------------------------------------------------------|----------|
| I     | GSM556413, GSM556414, GSM556415, <u>GSM556416</u> , <u>GSM556417</u> , GSM556418, GSM556419, GPL570<br>SSc                                                                                                                                                                                                                                                                                                                                                                                                                                                                                                                                                                                                                                                                                                                                                                                                         |          |
|       | GSM556420, GSM556421, GSM556422, <u>GSM556423</u> , GSM556424, GSM556425, GSM556426,<br>(n=20)<br>GSM556427, GSM556428, <u>GSM556429</u> , GSM556430, <u>GSM556431</u> , <u>GSM556432</u>                                                                                                                                                                                                                                                                                                                                                                                                                                                                                                                                                                                                                                                                                                                          |          |
| II    | Normal GSM556441, GSM556442, GSM556443, GSM556444, GSM556445, GSM556446, GSM556447, GPL570<br>(n=10) GSM556448, GSM556449, <u>GSM556450</u>                                                                                                                                                                                                                                                                                                                                                                                                                                                                                                                                                                                                                                                                                                                                                                        |          |
|       | GSM827736, GSM827737, GSM827738, <u>GSM827739</u> , GSM827740, GSM827741, GSM827742, GPL6947<br><br>GSM827743, GSM827744, GSM827745, GSM827746, GSM827747, GSM827748, GSM827749,<br><br>GSM827750, GSM827751, GSM827752, GSM827753, GSM827754, GSM827755, GSM827756,<br><br>GSM827757, GSM827758, GSM827759, <u>GSM827760</u> , GSM827761, GSM827762, GSM827763,<br><br>SSc GSM827764, GSM827765, GSM827766, GSM827767, GSM827768, GSM827769, GSM827770,<br><br>(n=69) GSM827771, GSM827772, GSM827773, GSM827774, GSM827775, GSM827776, GSM827777,<br><br>GSM827778, GSM827779, GSM827780, GSM827781, GSM827782, <u>GSM827783</u> , <u>GSM827784</u> ,<br><br><u>GSM827785</u> , GSM827786, GSM827787, GSM827788, GSM827789, GSM827790, GSM827791,<br><br>GSM827792, GSM827793, GSM827794, GSM827795, GSM827796, GSM827797, GSM827798,<br><br>GSM827799, GSM82800, GSM82801, GSM82802, <u>GSM82803</u> , GSM82804 |          |
|       | Normal GSM827665, GSM827666, GSM827667, GSM827668, GSM827669, GSM827670, GSM827671, GPL6947<br>(n=41) GSM827672, GSM827673, GSM827674, GSM827675, GSM827676, GSM827677, GSM827678,                                                                                                                                                                                                                                                                                                                                                                                                                                                                                                                                                                                                                                                                                                                                 |          |
|       |                                                                                                                                                                                                                                                                                                                                                                                                                                                                                                                                                                                                                                                                                                                                                                                                                                                                                                                    |          |

---

GSM827679, GSM827680, GSM827681, GSM827682, GSM827683, GSM827684, GSM827685,  
GSM827686, GSM827687, GSM827688, GSM827689, GSM827690, GSM827691, GSM827692,  
GSM827693, GSM827694, GSM827695, GSM827696, GSM827697, GSM827698, GSM827699,  
GSM827700, GSM827701, GSM827702, GSM827703, GSM827704, GSM827705

---

GSM1050776, GSM1050795, GSM1050811, GSM1050814, GSM1050817, GSM1050818, GPL10558  
LC  
GSM1050840, GSM1050855, GSM1050929, GSM1050936, GSM1050958, GSM1050961,  
(n=16)  
GSM1050967, GSM1050980, GSM1050993, GSM1051018

---

GSM1050741, GSM1050742, GSM1050743, GSM1050744, GSM1050745, GSM1050746, GPL10558  
GSM1050747, GSM1050749, GSM1050750, GSM1050751, GSM1050752, GSM1050753,  
GSM1050755, GSM1050756, GSM1050757, GSM1050764, GSM1050765, GSM1050768,  
GSM1050769, GSM1050770, GSM1050771, GSM1050772, GSM1050773, GSM1050781,  
GSM1050782, GSM1050785, GSM1050786, GSM1050787, GSM1050788, GSM1050794,  
GSM1050796, GSM1050799, GSM1050800, GSM1050803, GSM1050804, GSM1050805,  
III  
GSM1050806, GSM1050808, GSM1050809, GSM1050810, GSM1050812, GSM1050815,  
Normal  
GSM1050819, GSM1050820, GSM1050821, GSM1050823, GSM1050824, GSM1050825,  
(n=113)  
GSM1050827, GSM1050828, GSM1050829, GSM1050831, GSM1050832, GSM1050833,  
GSM1050835, GSM1050837, GSM1050838, GSM1050839, GSM1050841, GSM1050842,  
GSM1050844, GSM1050846, GSM1050847, GSM1050849, GSM1050850, GSM1050851,  
GSM1050852, GSM1050853, GSM1050854, GSM1050856, GSM1050858, GSM1050859,  
GSM1050860, GSM1050861, GSM1050862, GSM1050928, GSM1050932, GSM1050935,  
GSM1050937, GSM1050938, GSM1050939, GSM1050940, GSM1050941, GSM1050947,  
GSM1050954, GSM1050956, GSM1050957, GSM1050959, GSM1050962, GSM1050964,

---

---

GSM1050968, GSM1050972, GSM1050978, GSM1050981, GSM1050984, GSM1050987,

GSM1050989, GSM1050991, GSM1050992, GSM1050995, GSM1050997, GSM1050998,

GSM1050999, GSM1051000, GSM1051004, GSM1051010, GSM1051011, GSM1051012,

GSM1051013, GSM1051015, GSM1051016, GSM1051017, GSM1051020

---

GSM320318, GSM320319, GSM320320, GSM320321, GSM320322, GSM320323, GSM320324, GPL6102

GSM320325, GSM320326, GSM320327, GSM320328, GSM320329, GSM320330, GSM320331,

GSM320332, GSM320333, GSM320334, GSM320335, GSM320336, GSM320337, GSM320338,

LC GSM320339, GSM320340, GSM320341, GSM320342, GSM320343, GSM320344, GSM320345,

(n=54) GSM320346, GSM320347, GSM320348, GSM320349, GSM320350, GSM320351, GSM320352,

GSM320353, GSM320354, GSM320355, GSM320356, GSM320357, GSM320358, GSM320359,

IV GSM320387, GSM320388, GSM320389, GSM320390, GSM320391, GSM320393, GSM320394,

GSM320396, GSM320397, GSM320398, GSM320400, GSM320401

---

GSM320361, GSM320362, GSM320363, GSM320365, GSM320366, GSM320367, GSM320369, GPL6102

GSM320370, GSM320371, GSM320372, GSM320373, GSM320375, GSM320376, GSM320377,

Normal

GSM320379, GSM320380, GSM320382, GSM320383, GSM320385, GSM320404, GSM320405,

(n=32)

GSM320407, GSM320408, GSM320410, GSM320411, GSM320413, GSM320415, GSM320416,

GSM320417, GSM320418, GSM320419, GSM320420

---

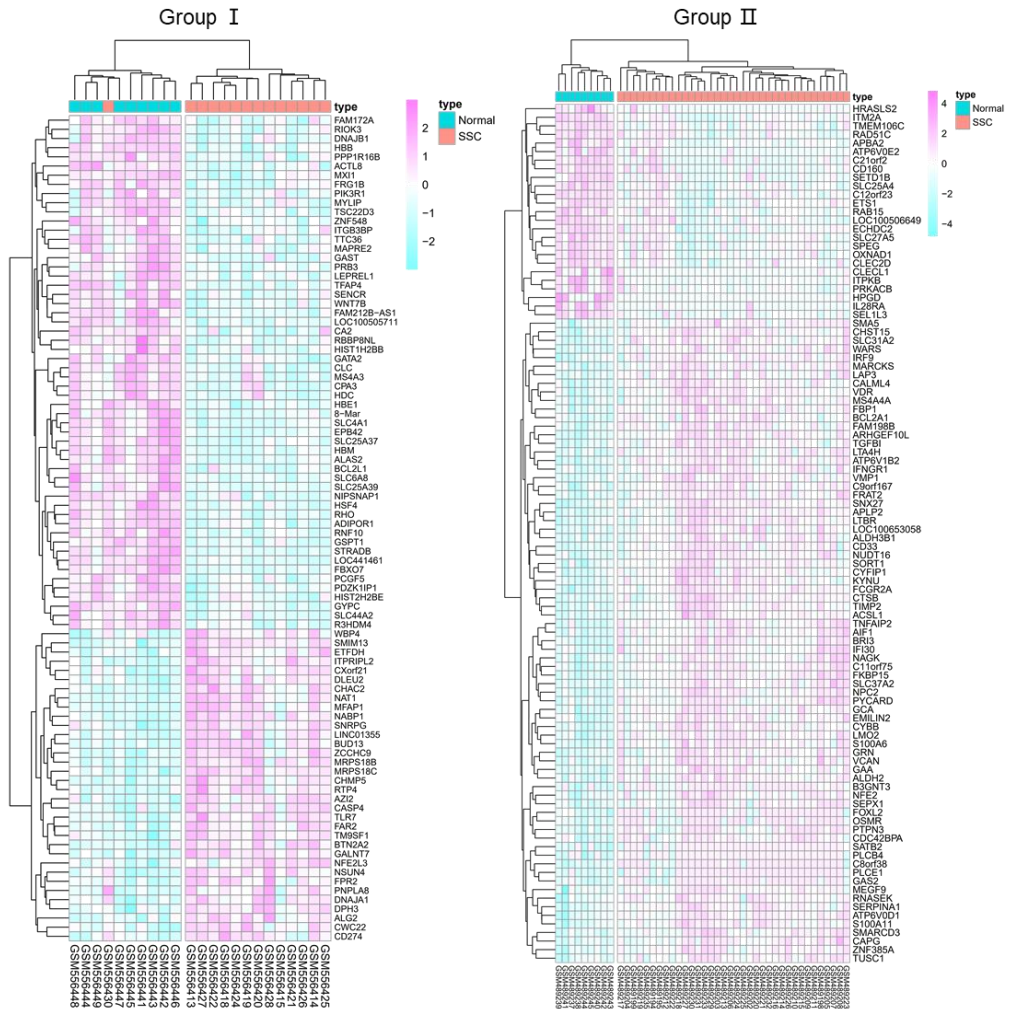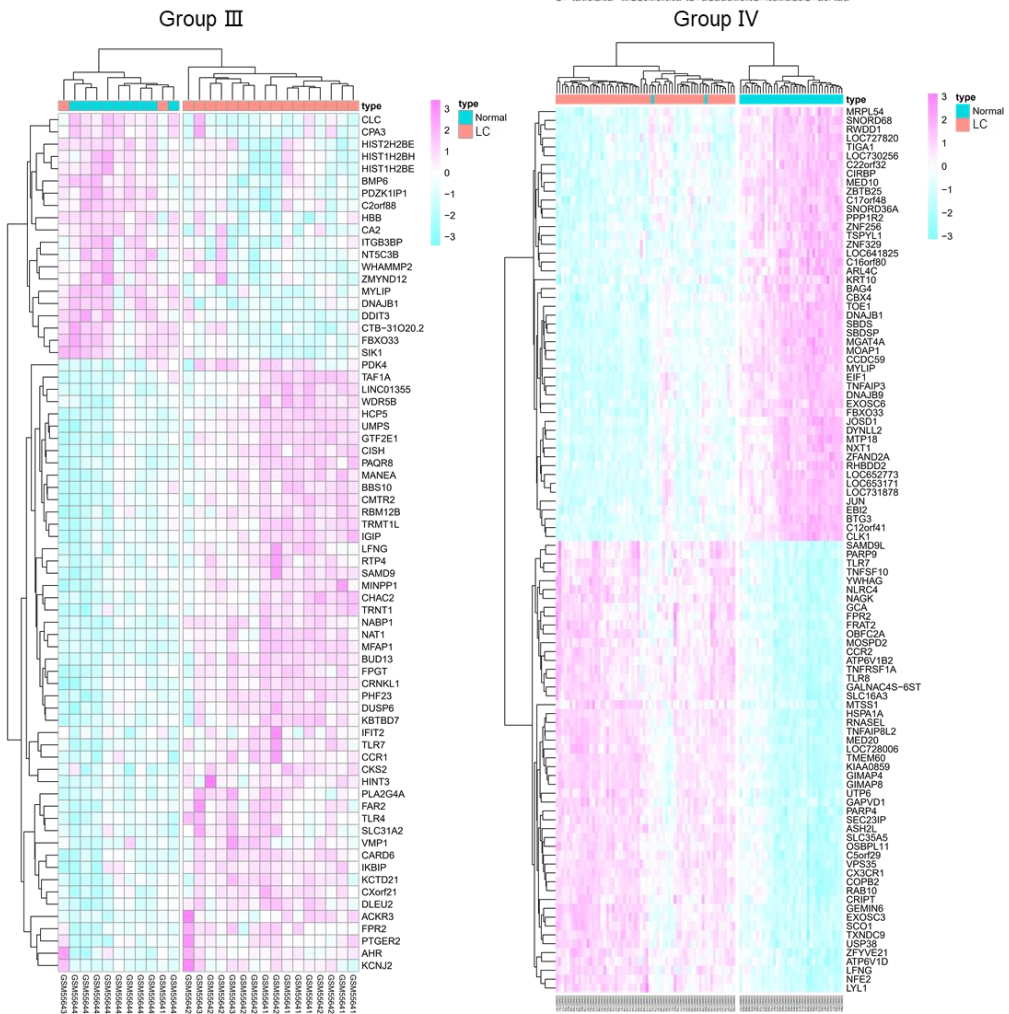

**Fig. S1.** Hierarchical clustering heatmap of top-ranked DEGs screened from systemic sclerosis (Group I and Group II) and lung cancer (Group III and Group IV).
